# Supplementary figures and images for: Meso-2,3-dimercaptosuccinic acid: from heavy metal chelation to CdS quantum dots
Source: Royal Society of Chemistry journal article supplement (doi:10.1039/c2jm15741a), 2012-01-01

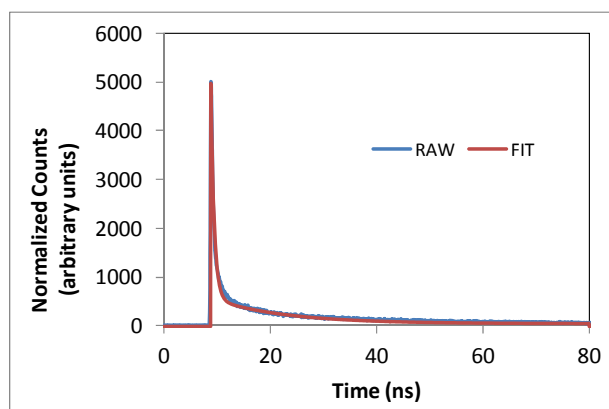

**Figure S1.** PL decay curves ( $\lambda_{\text{ex}}=350$  nm) of CdS<sub>2.7</sub> at RT

Supplement: c2jm15741a.pdf [file c2jm15741a.pdf]
